# Supplementary material for: Tuning the surface properties of novel ternary iron(iii) fluoride-based catalysts using the template effect of the matrix
Source: Royal Society of Chemistry journal article supplement (doi:10.1039/c4dt03229b), 2015-01-01
Supplement: c4dt03229b1.pdf [file c4dt03229b1.pdf]

Supporting information:

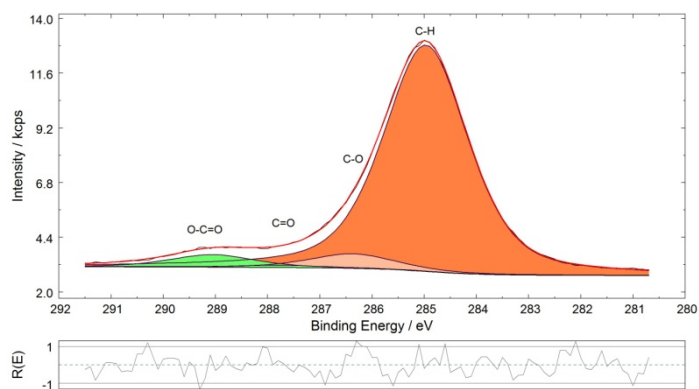

Fig. A: Highly resolved C 1s XP spectrum (non-monochromatized Al Kalpha radiation) of sol-gel prepared  $\text{FeF}_3$ .

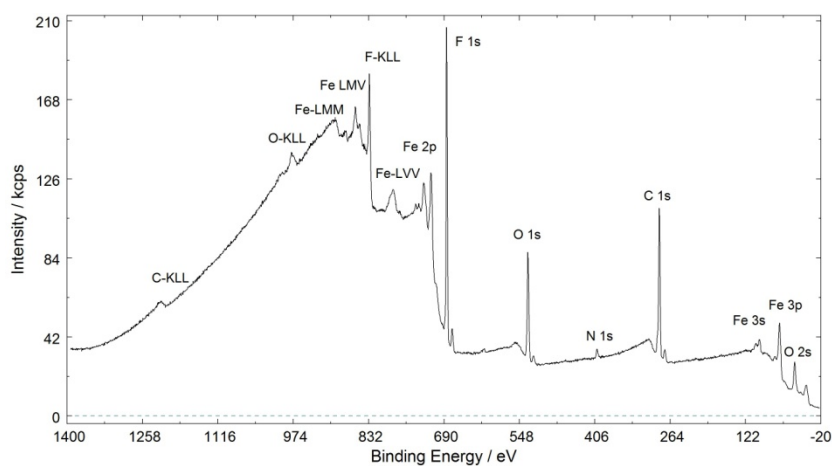

Fig. B: Survey XP spectrum (non-monochromatized Al Kalpha radiation) of sol-gel prepared  $\text{FeF}_3$ .

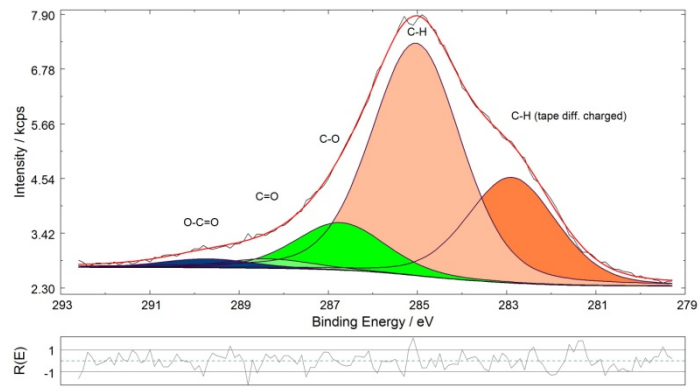

Fig. C: Highly resolved C 1s XP spectrum (non-monochromatized Al Kalpha radiation) of the ternary  $\text{FeF}_3\text{-MgF}_2$  catalyst.

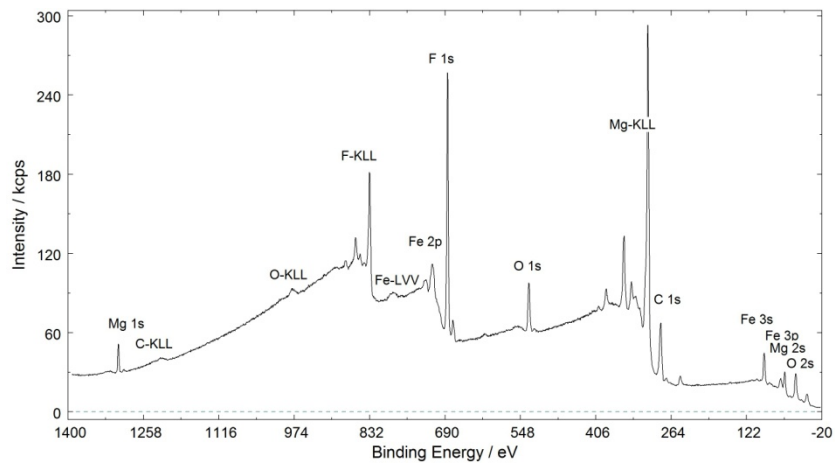

Fig. D: Survey XP spectrum (non-monochromatized Al Kalpha radiation) of the ternary  $\text{FeF}_3\text{-MgF}_2$  catalyst.
